# Supplementary material
Source: PubMed Central journal article supplement (PMC5801041)

# Region Differences in Six-Month Samples

  
**regulation of  
axon extension**

  
**substantia nigra  
development**

  
**alcohol catabolic  
process**

  
**hydro-lyase  
activity**

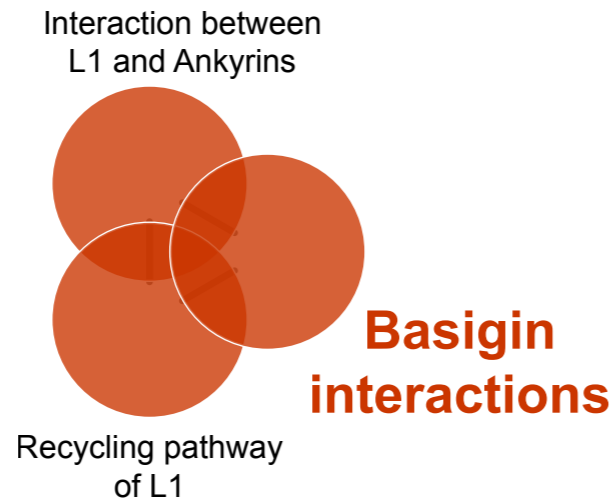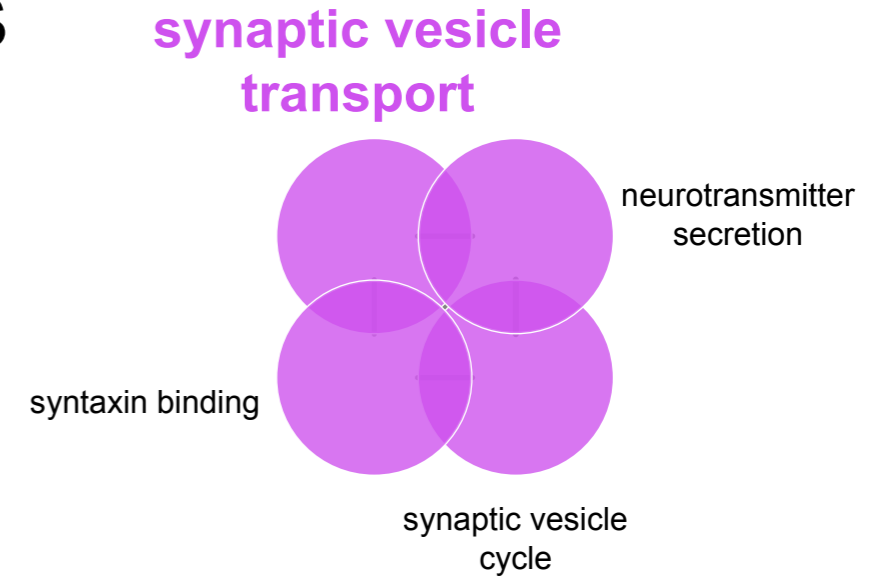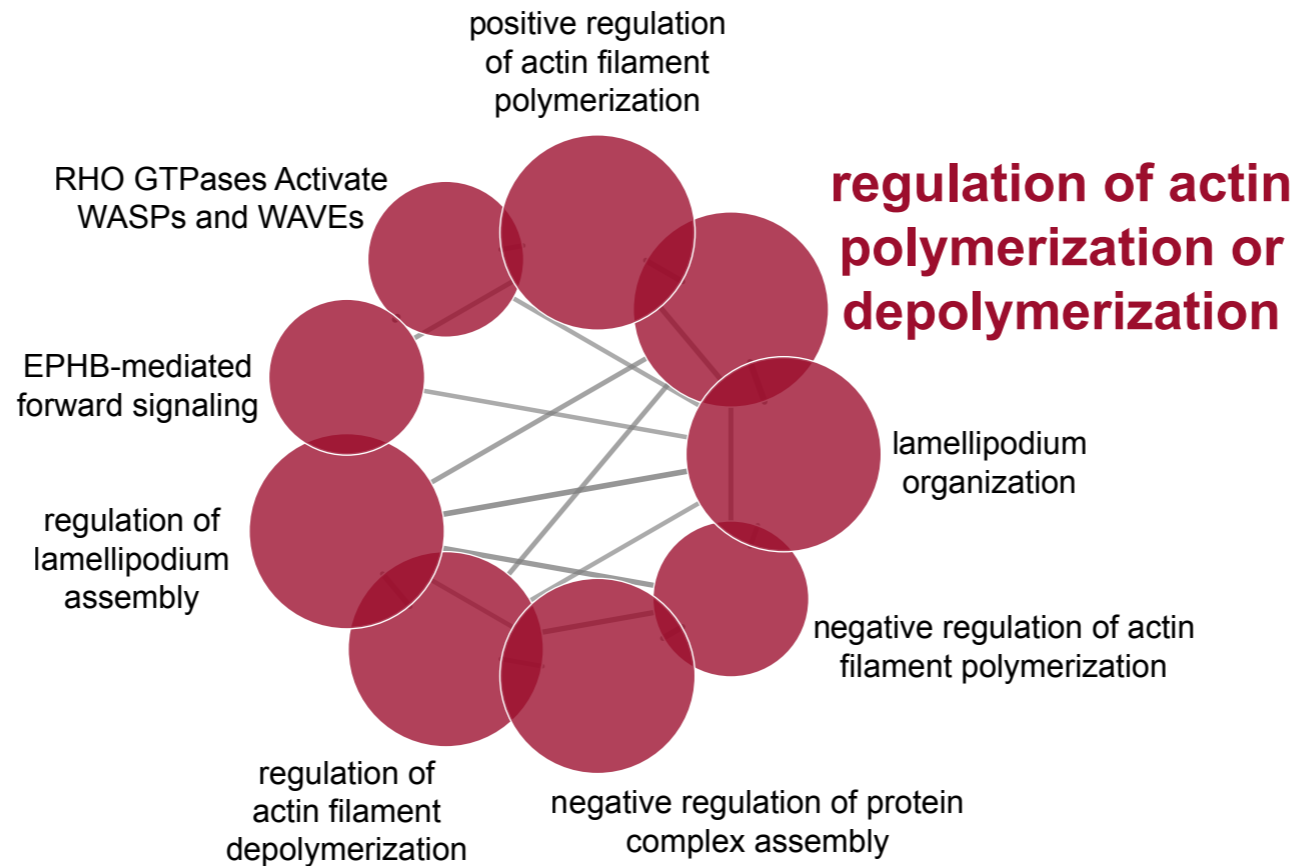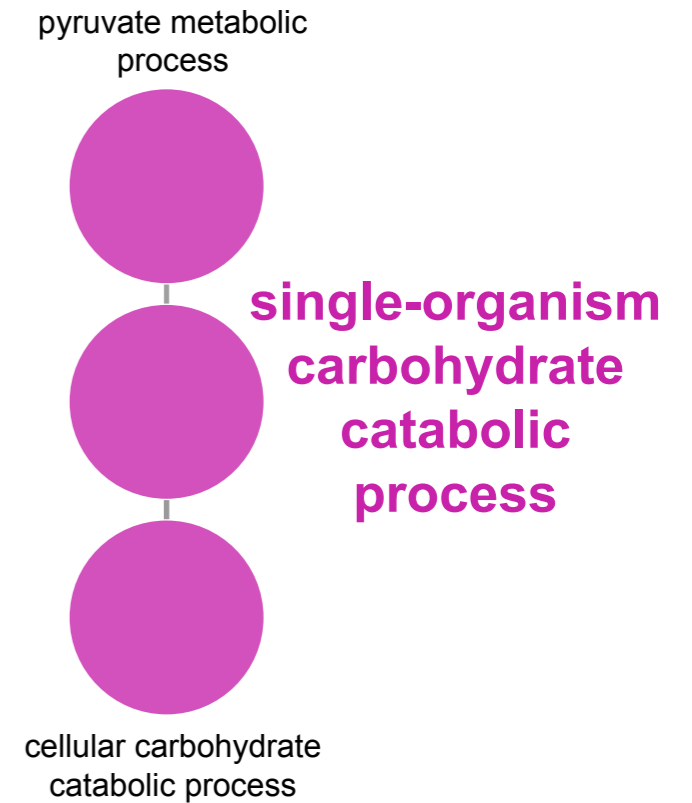

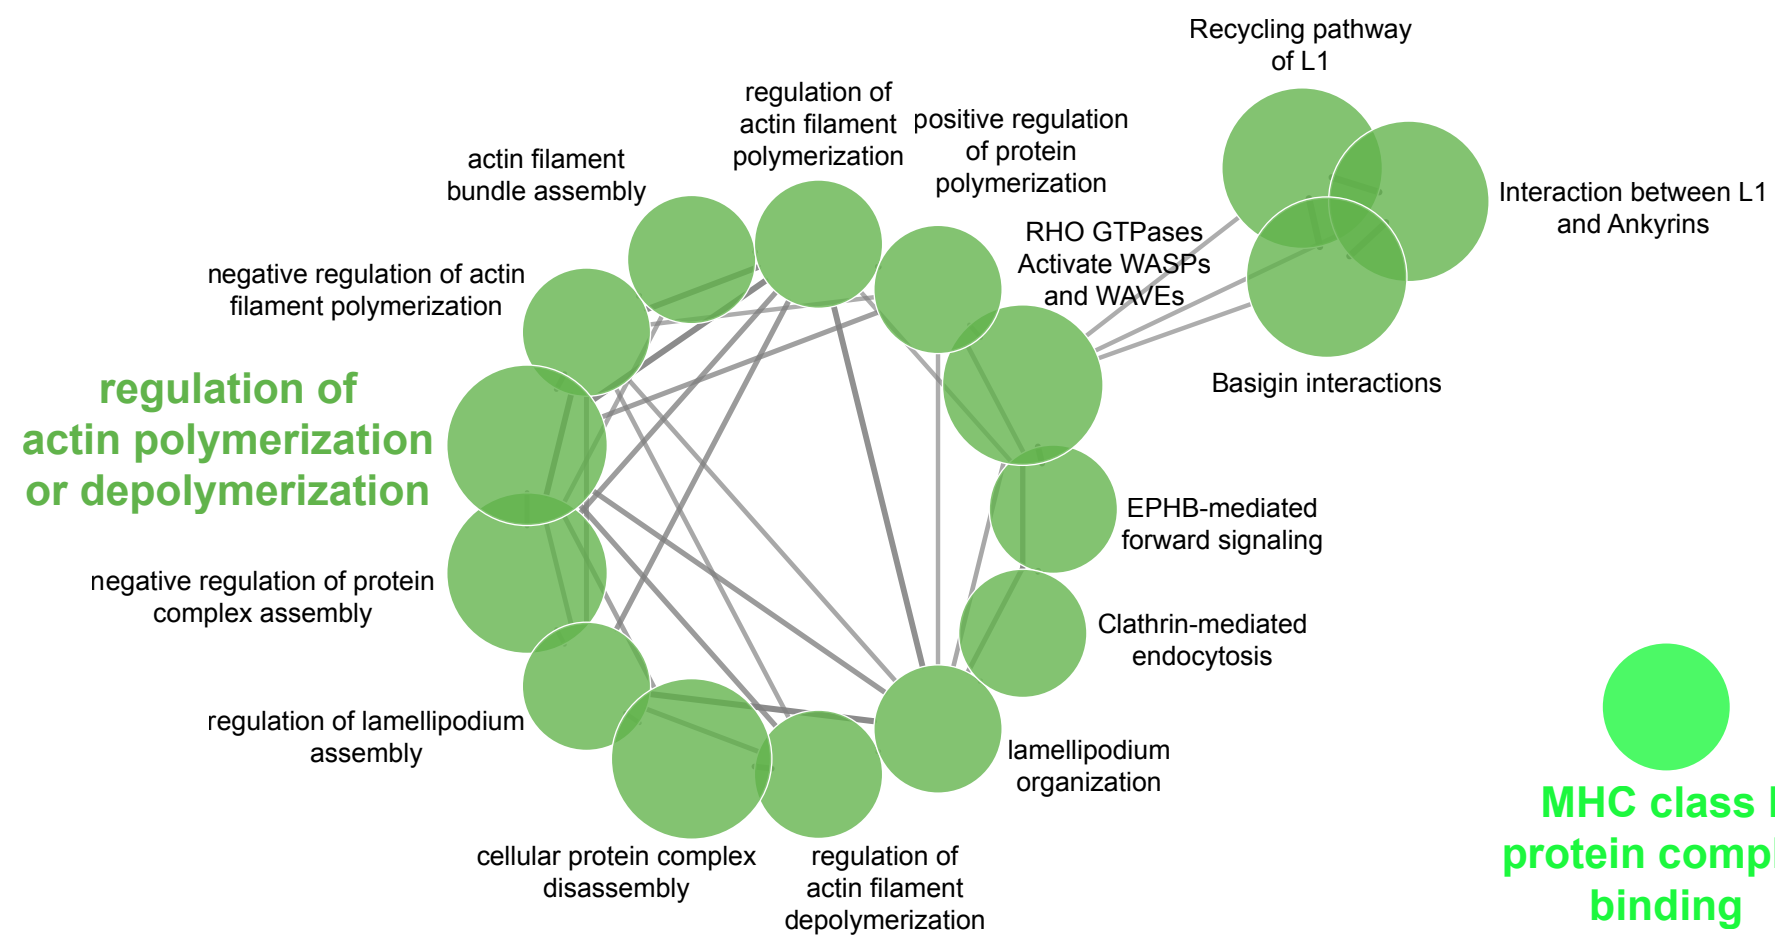

# Region Differences in Twelve-Month Samples

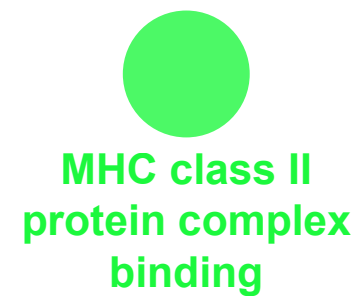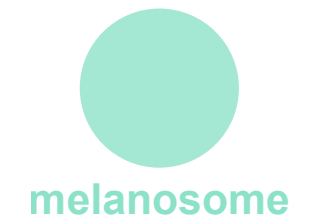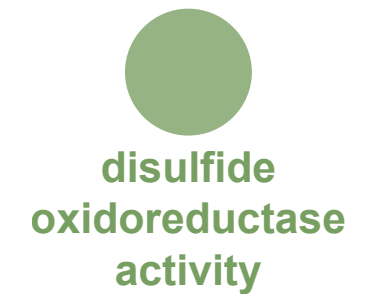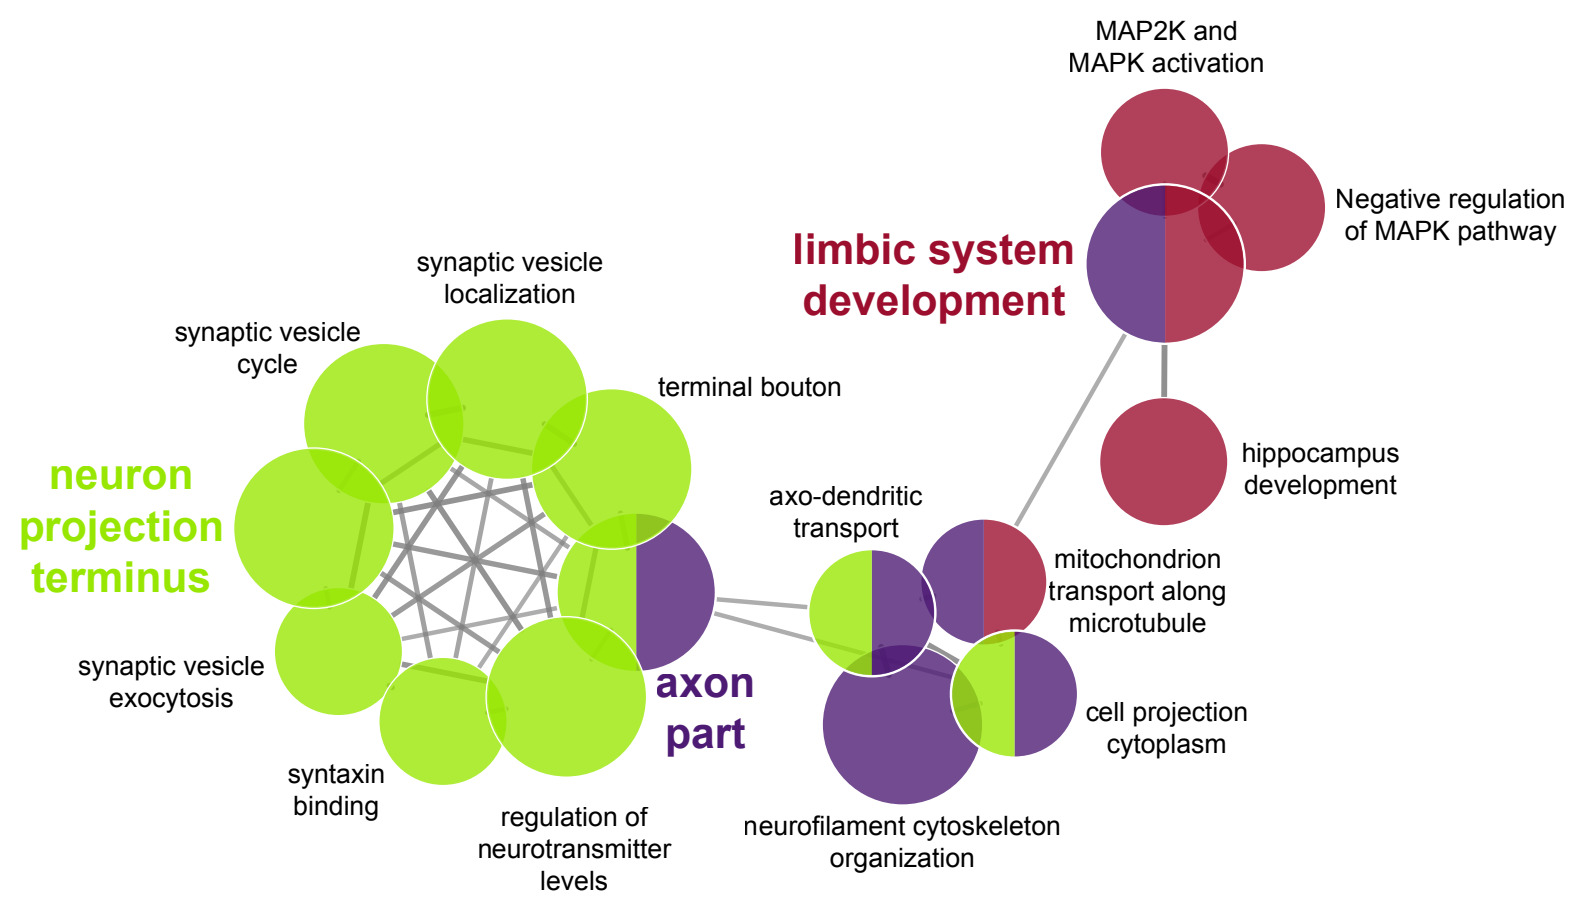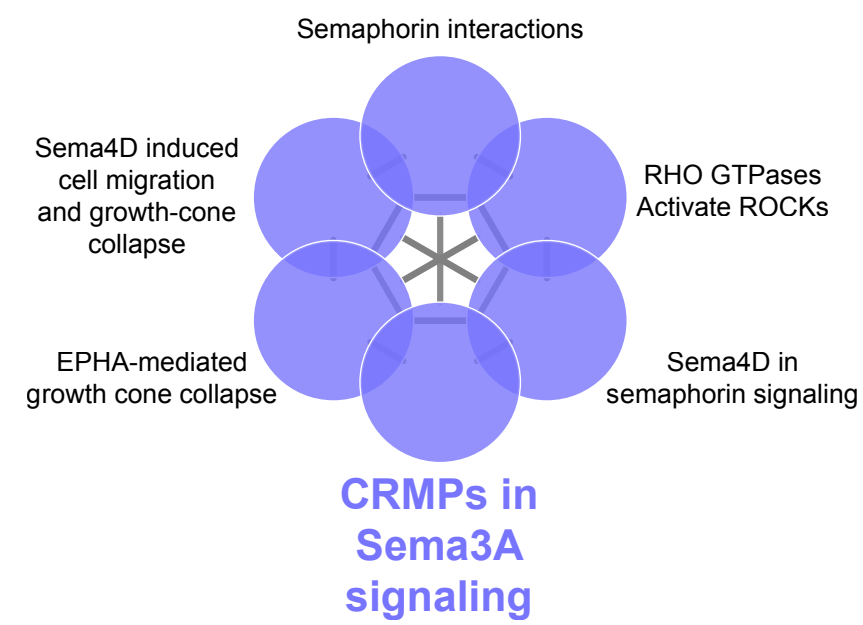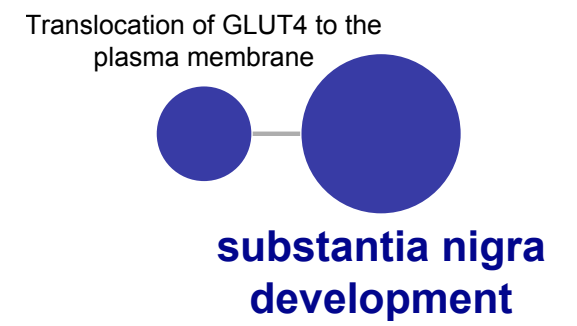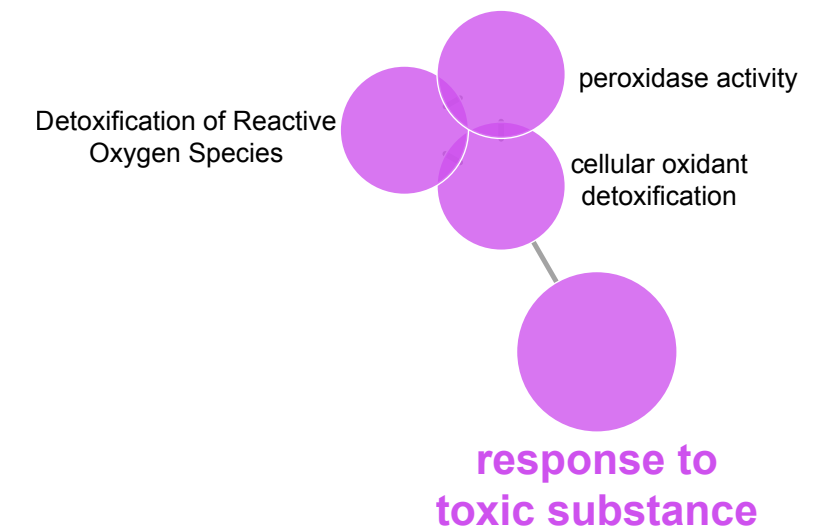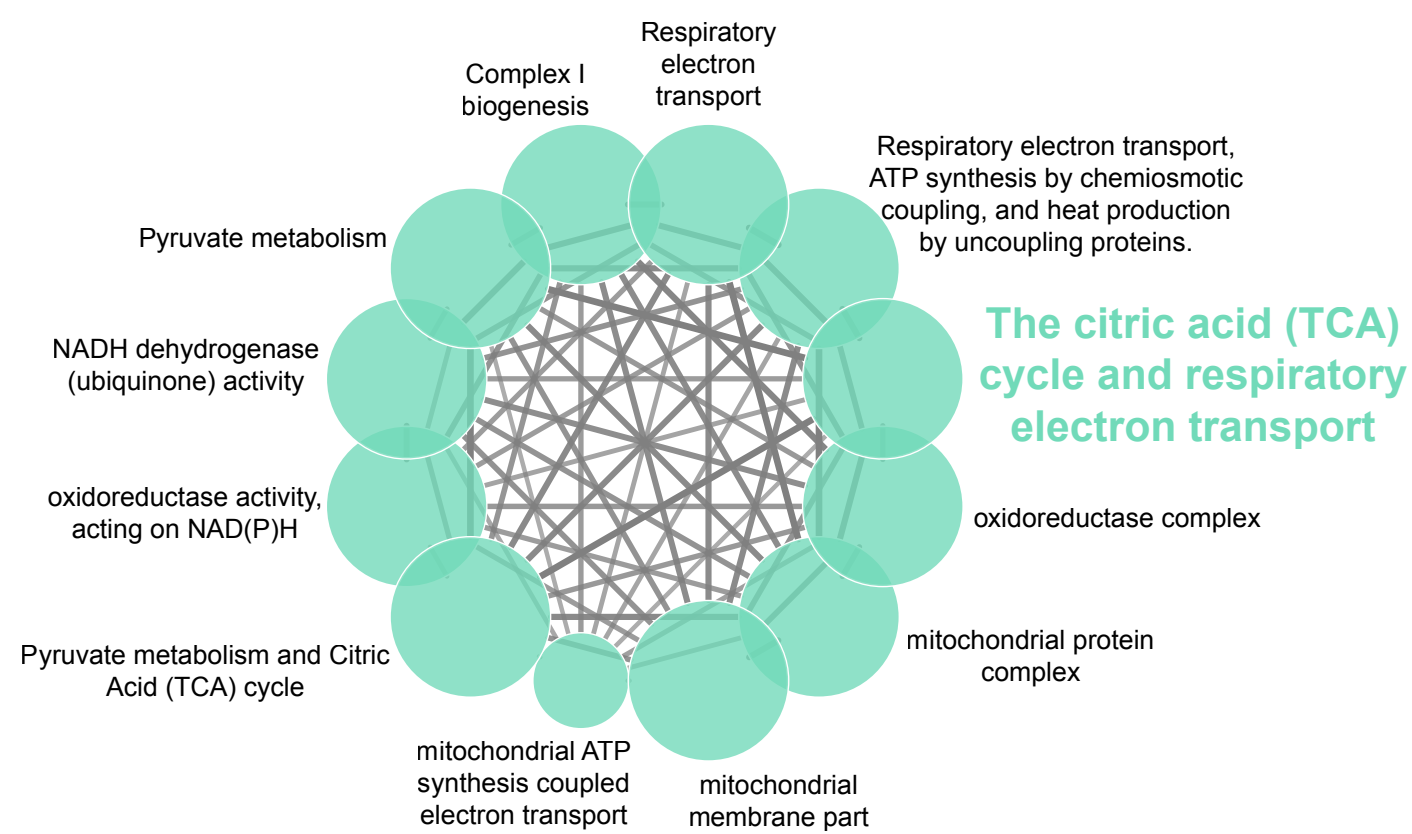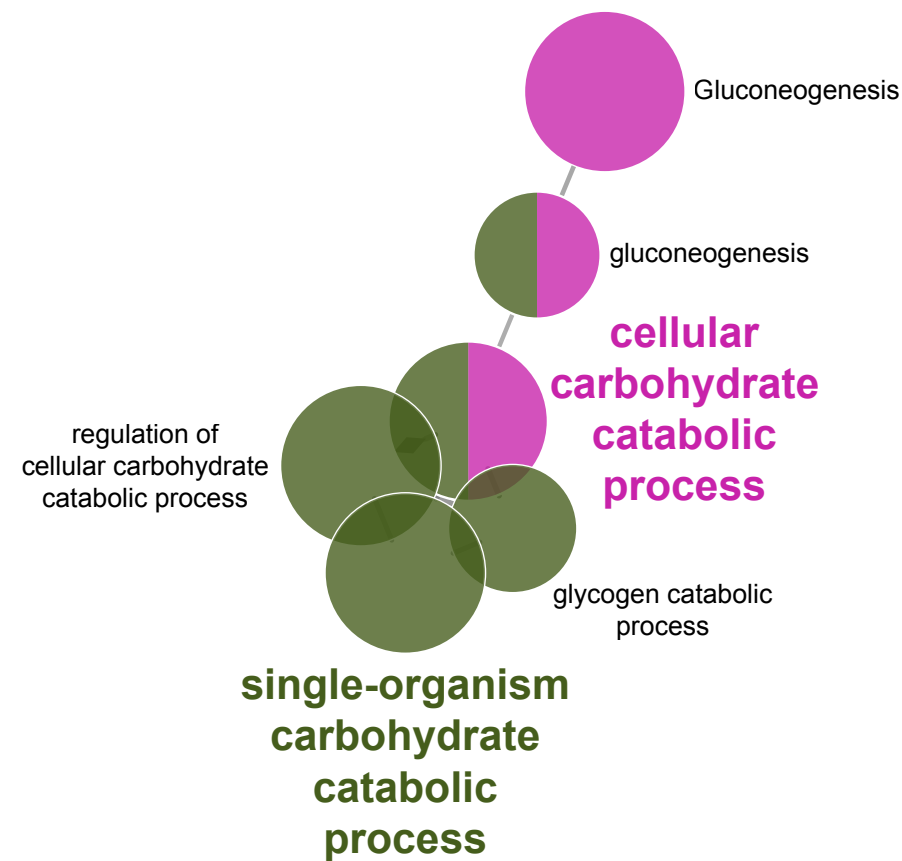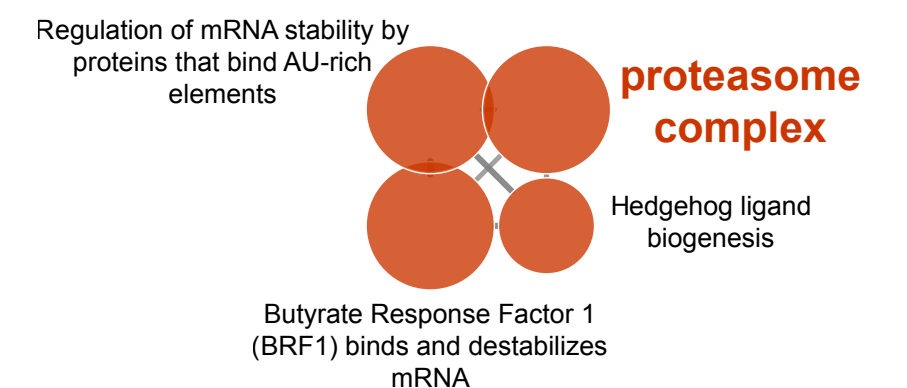

# Region Differences in Disomic Samples

negative regulation of protein complex assembly

negative regulation of actin filament polymerization

regulation of actin filament depolymerization

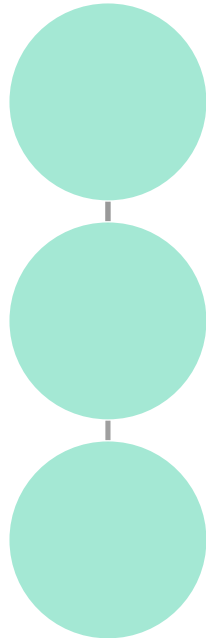

synaptic vesicle transport

syntaxin binding

synaptic vesicle cycle

neurotransmitter secretion

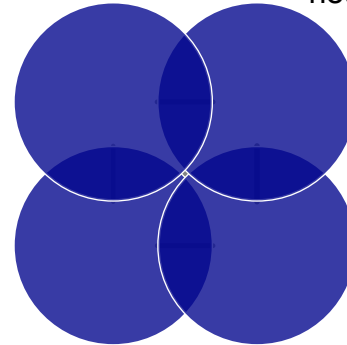

Interaction between L1 and Ankyrins

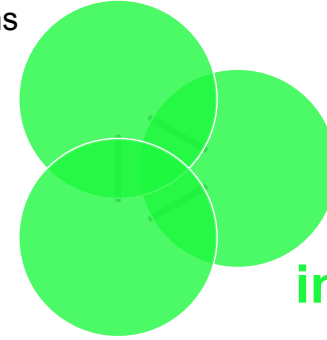

Recycling pathway of L1

Basigin interactions

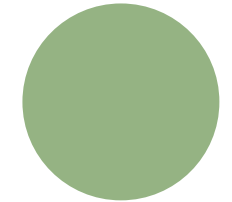

CRMPs in Sema3A signaling

# Region Differences in Trisomic Samples

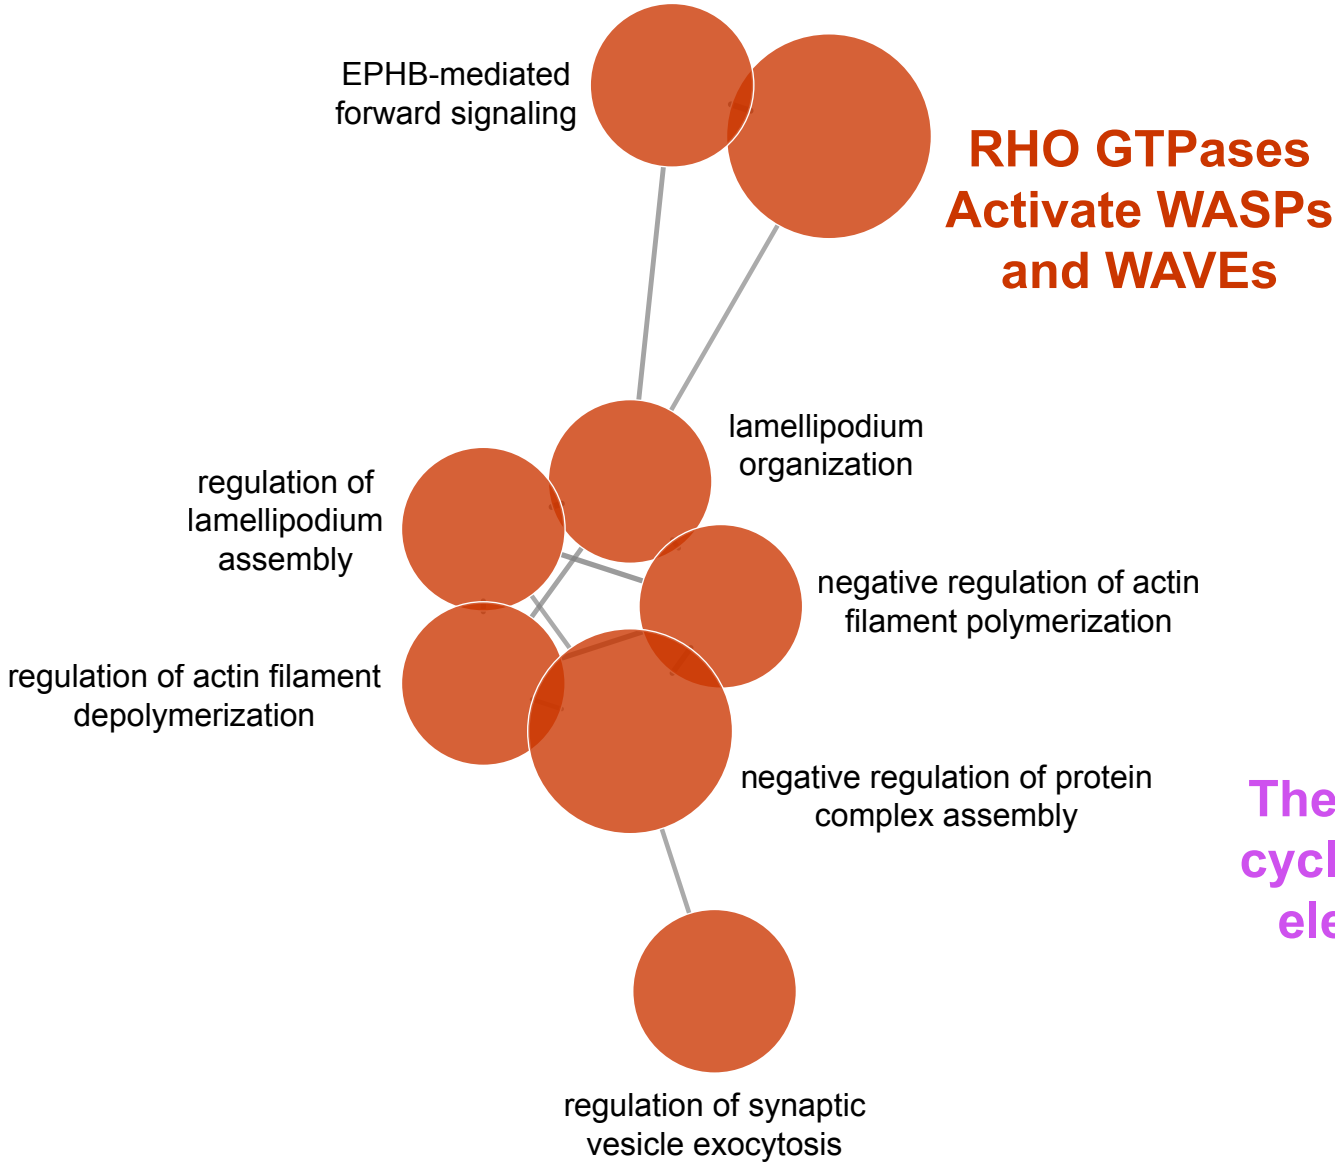

## The citric acid (TCA) cycle and respiratory electron transport

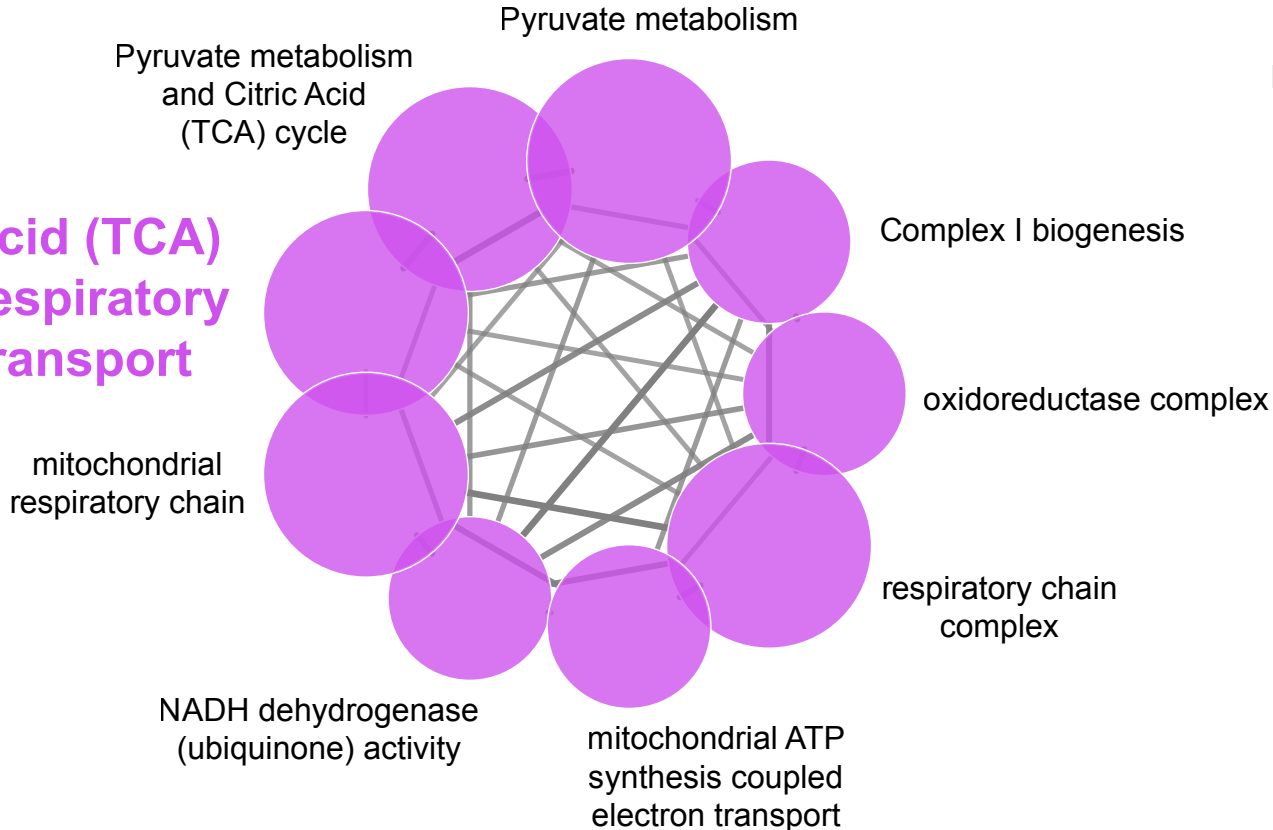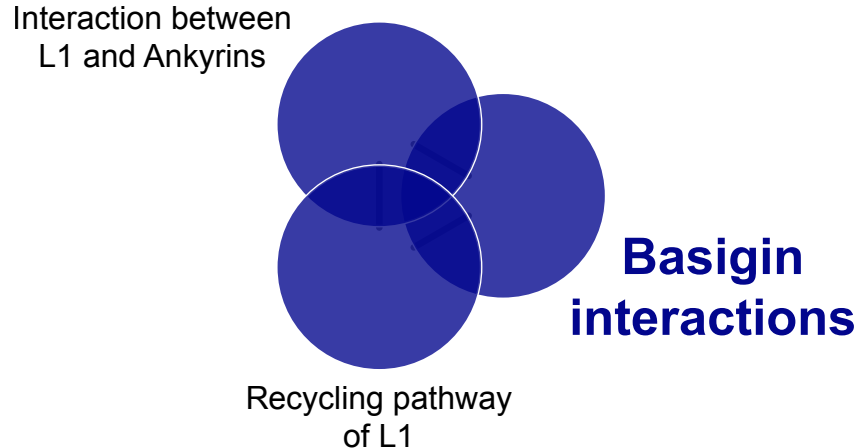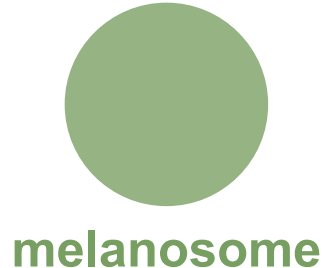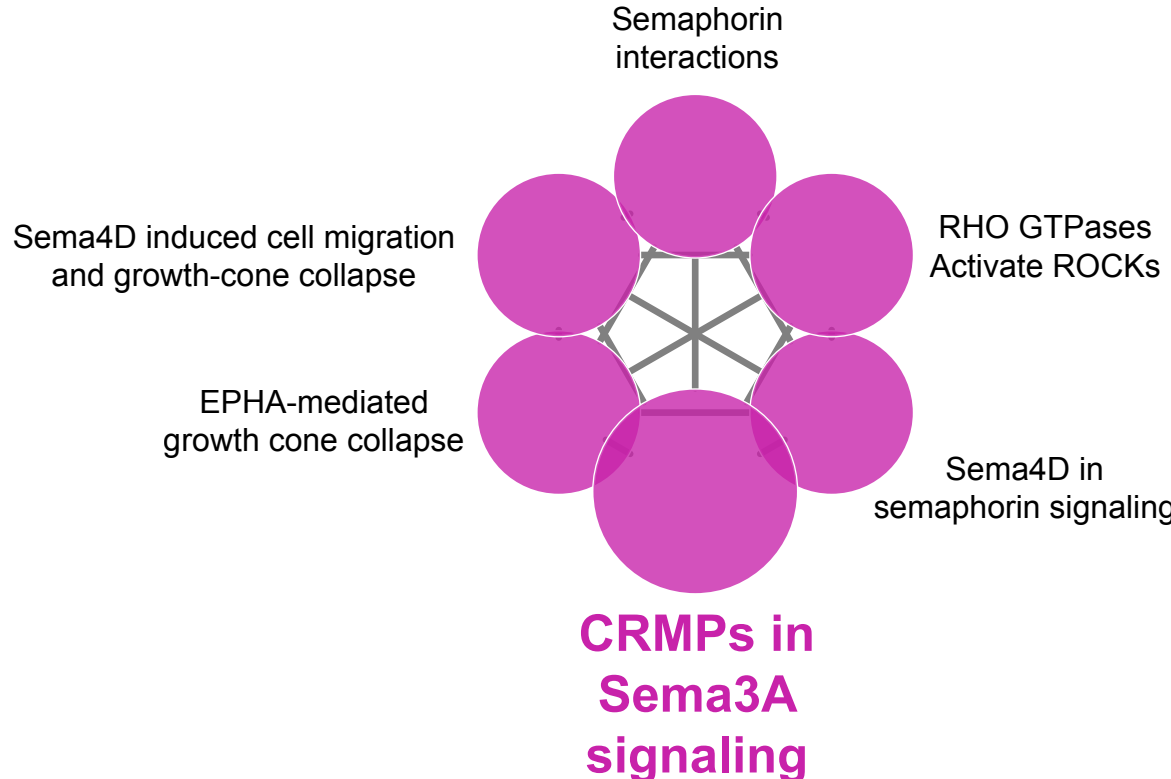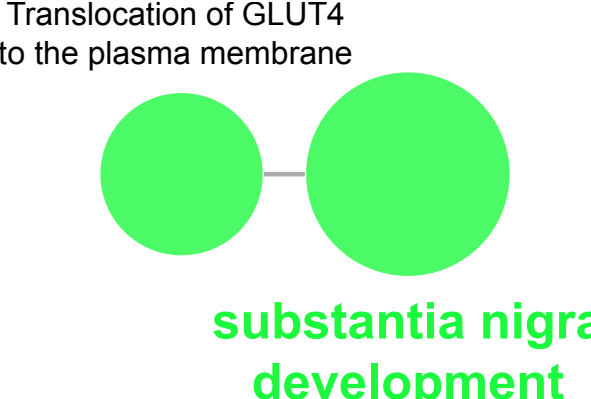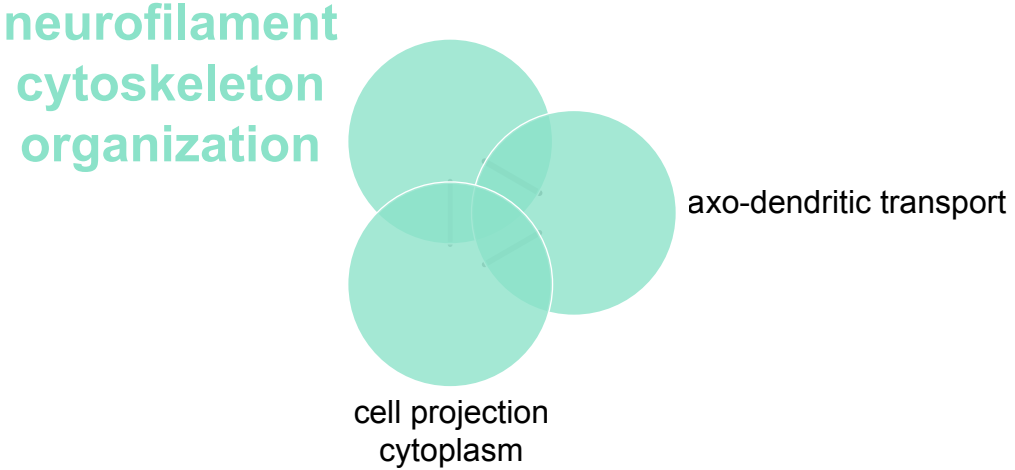

Supplement: NIHMS927454-supplement-3.pdf [file NIHMS927454-supplement-3.pdf]
