# Supplementary material
Source: PubMed Central journal article supplement (PMC5801041)
Supplement: NIHMS927454-supplement-2.pdf [file NIHMS927454-supplement-2.pdf]

# Age Differences in Cerebellum Samples

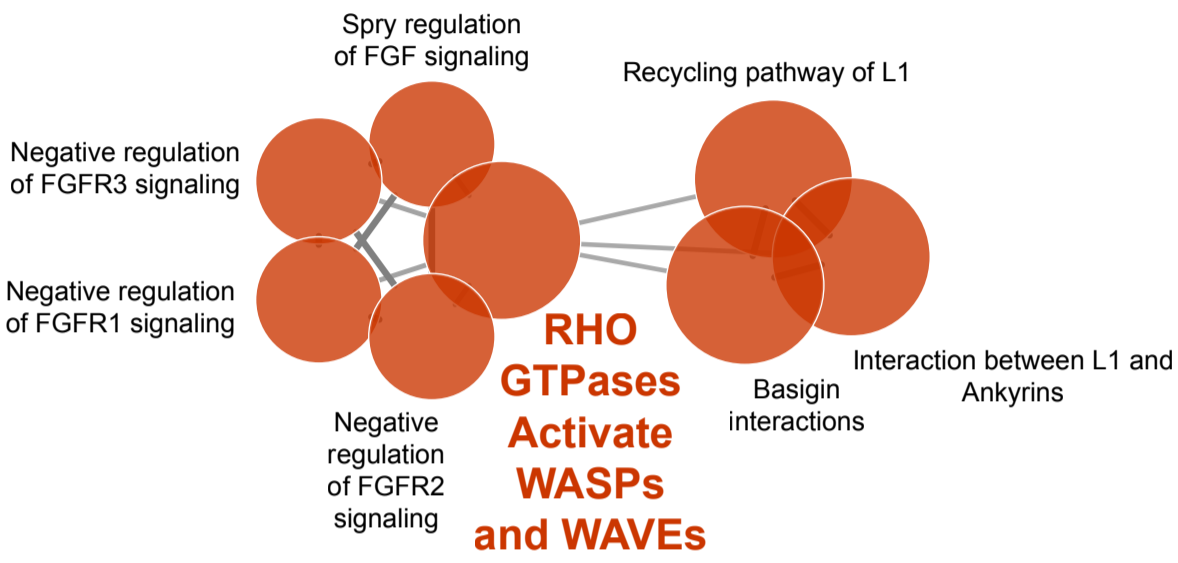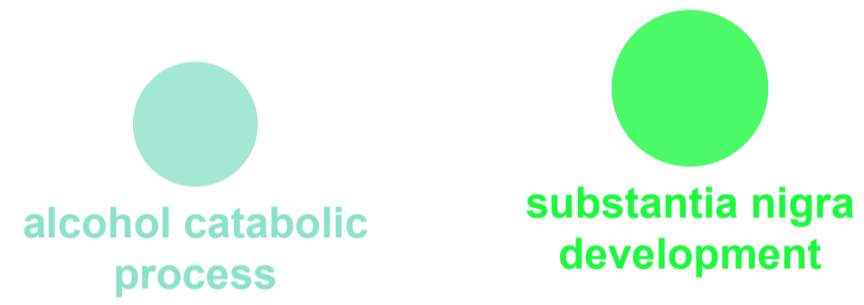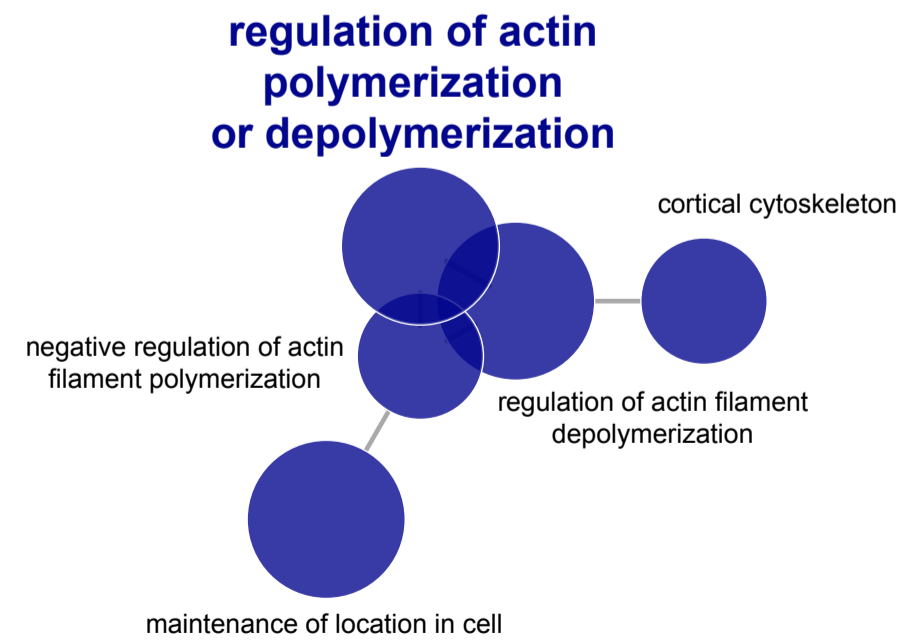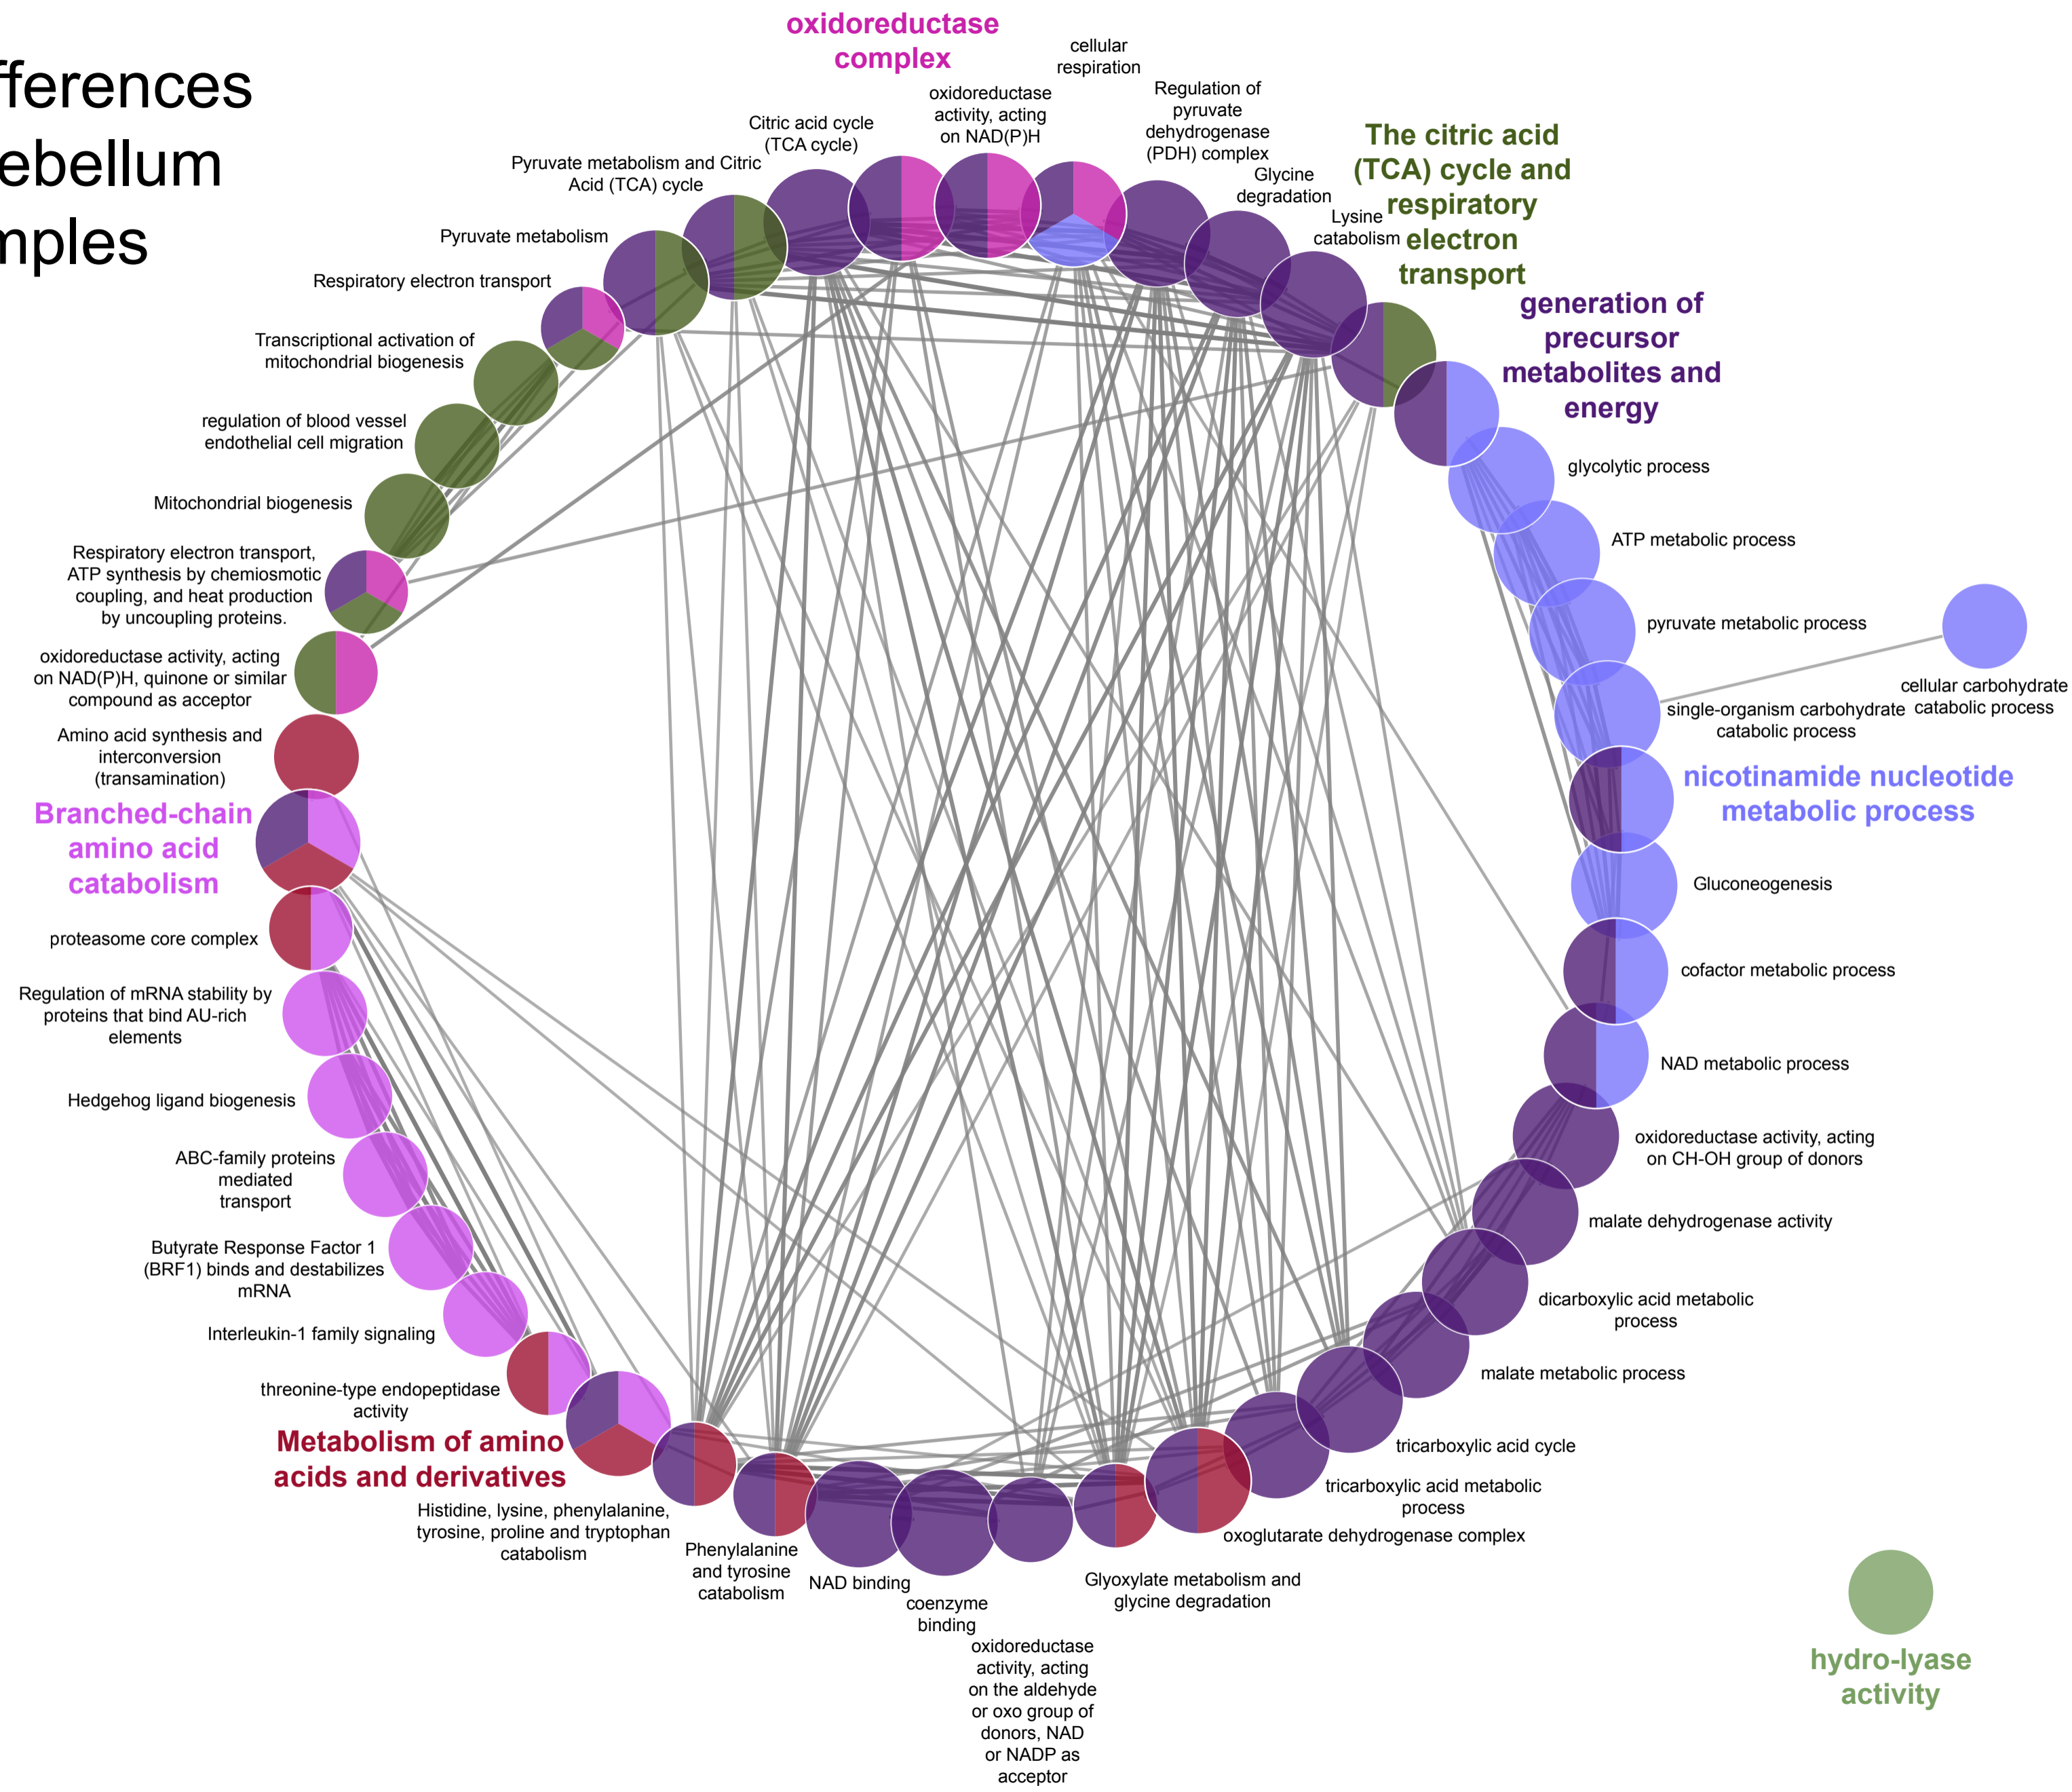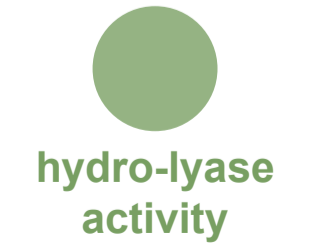

# Age Differences in Hippocampus Samples

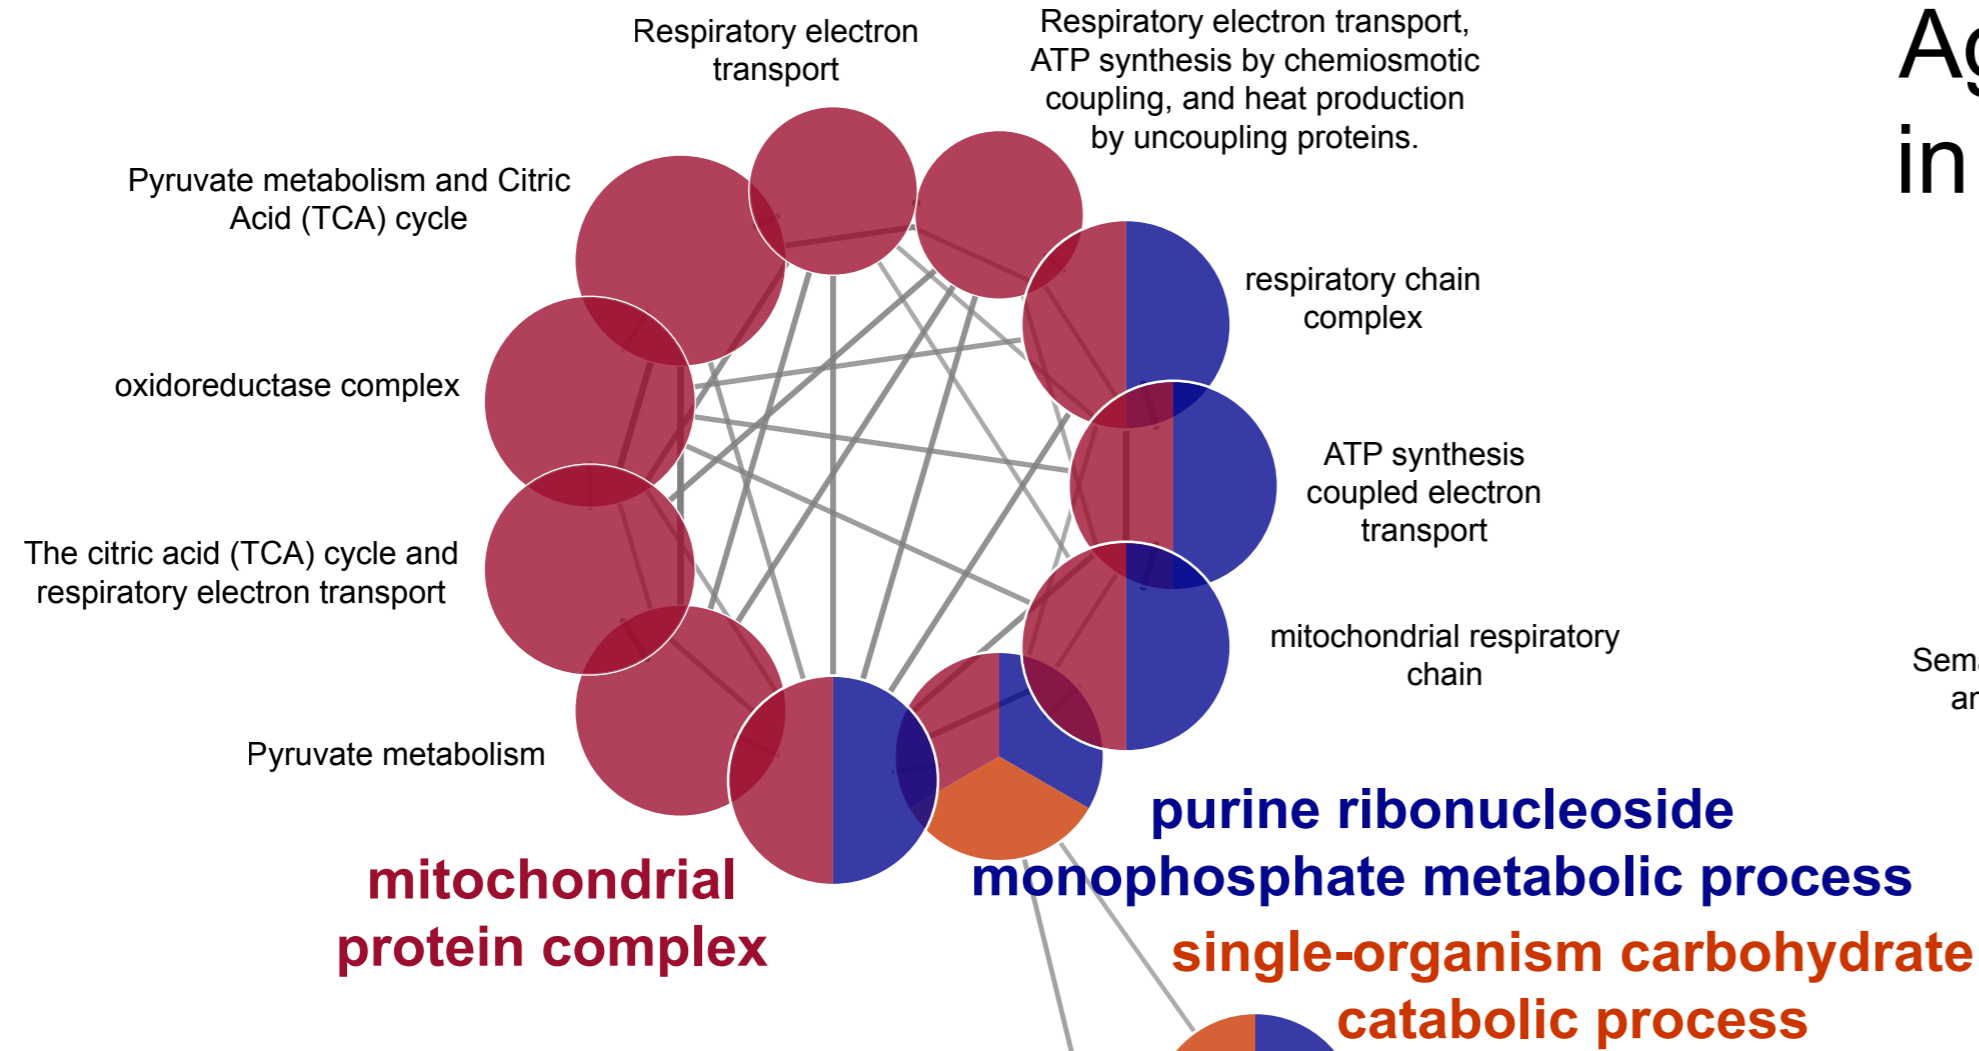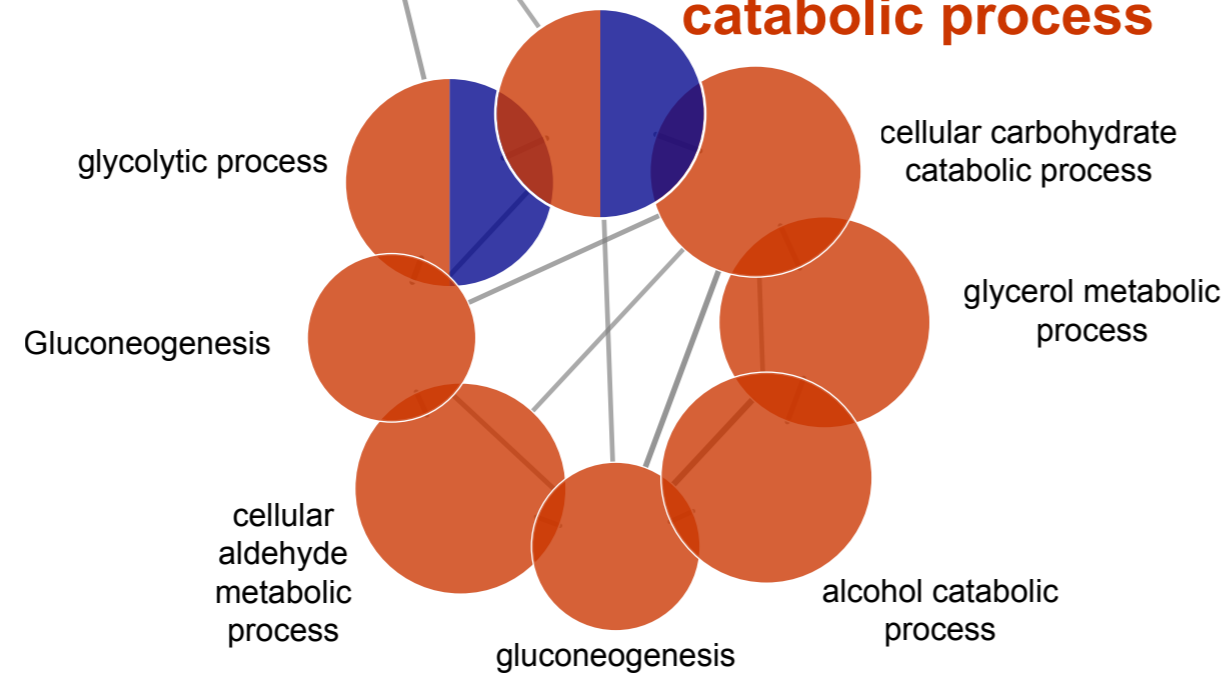

**hydro-lyase activity**

**purine ribonucleoside monophosphate biosynthetic process**

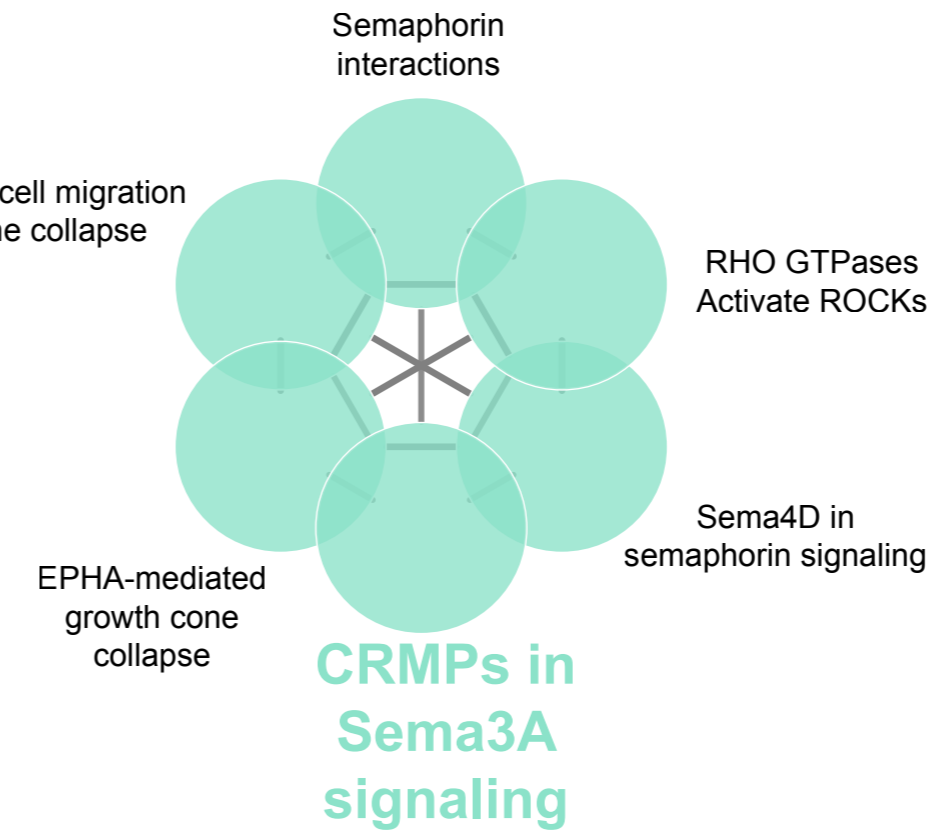

**Opioid Signalling**

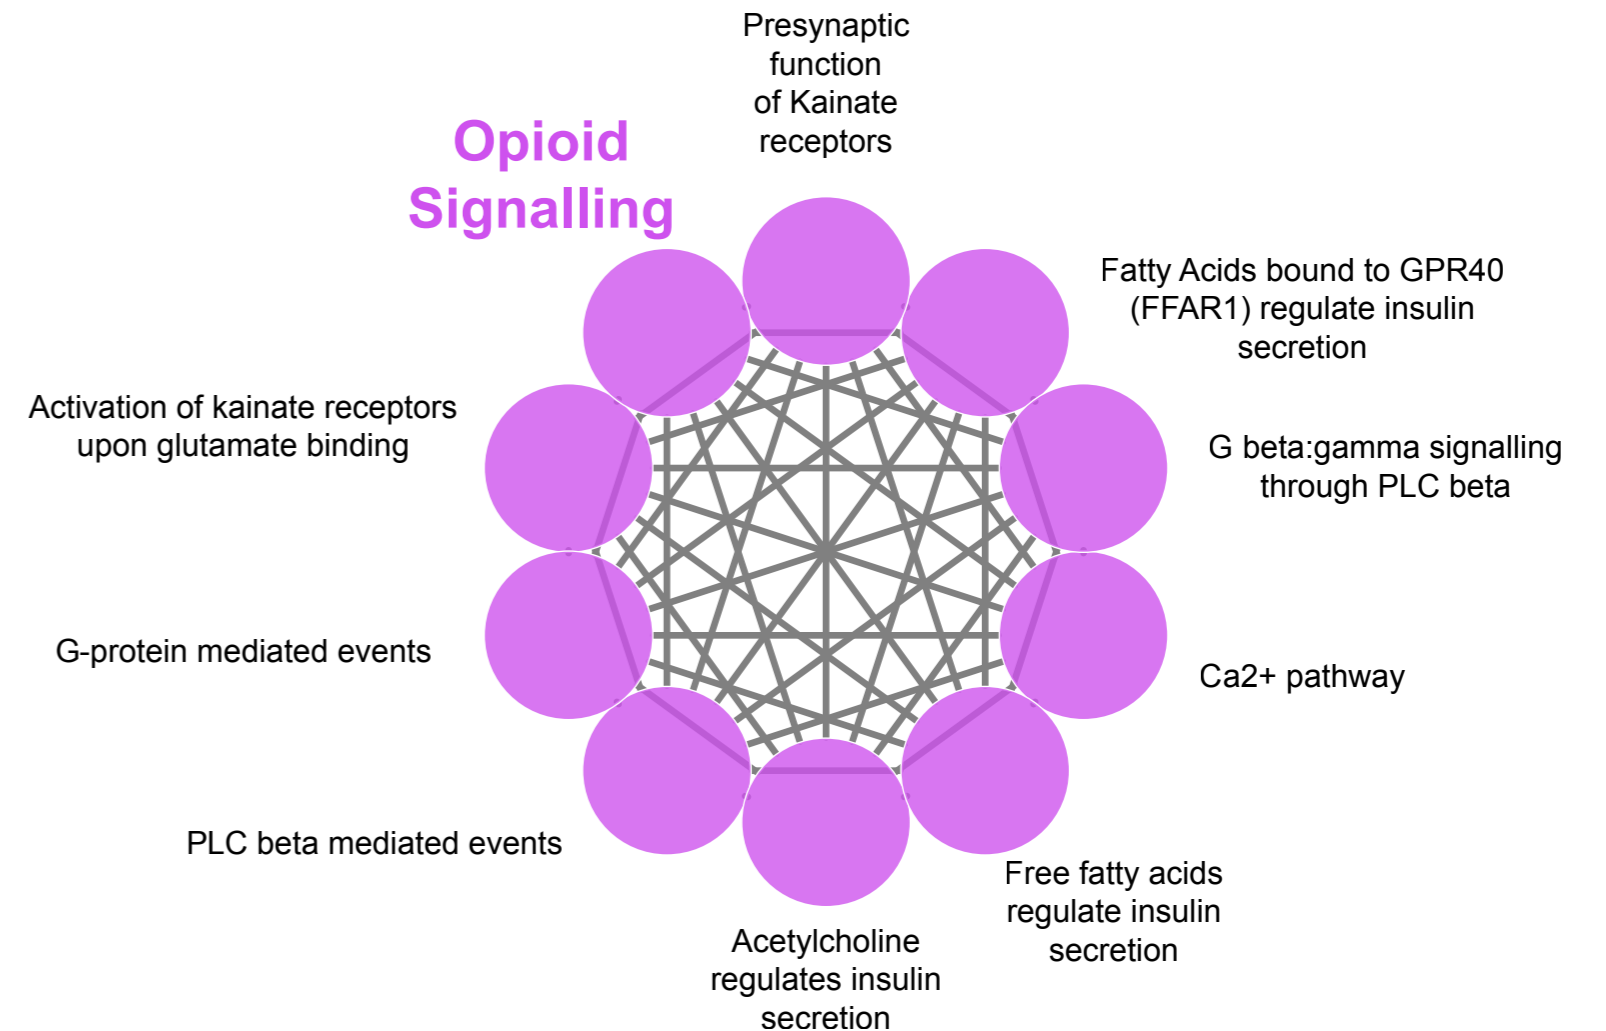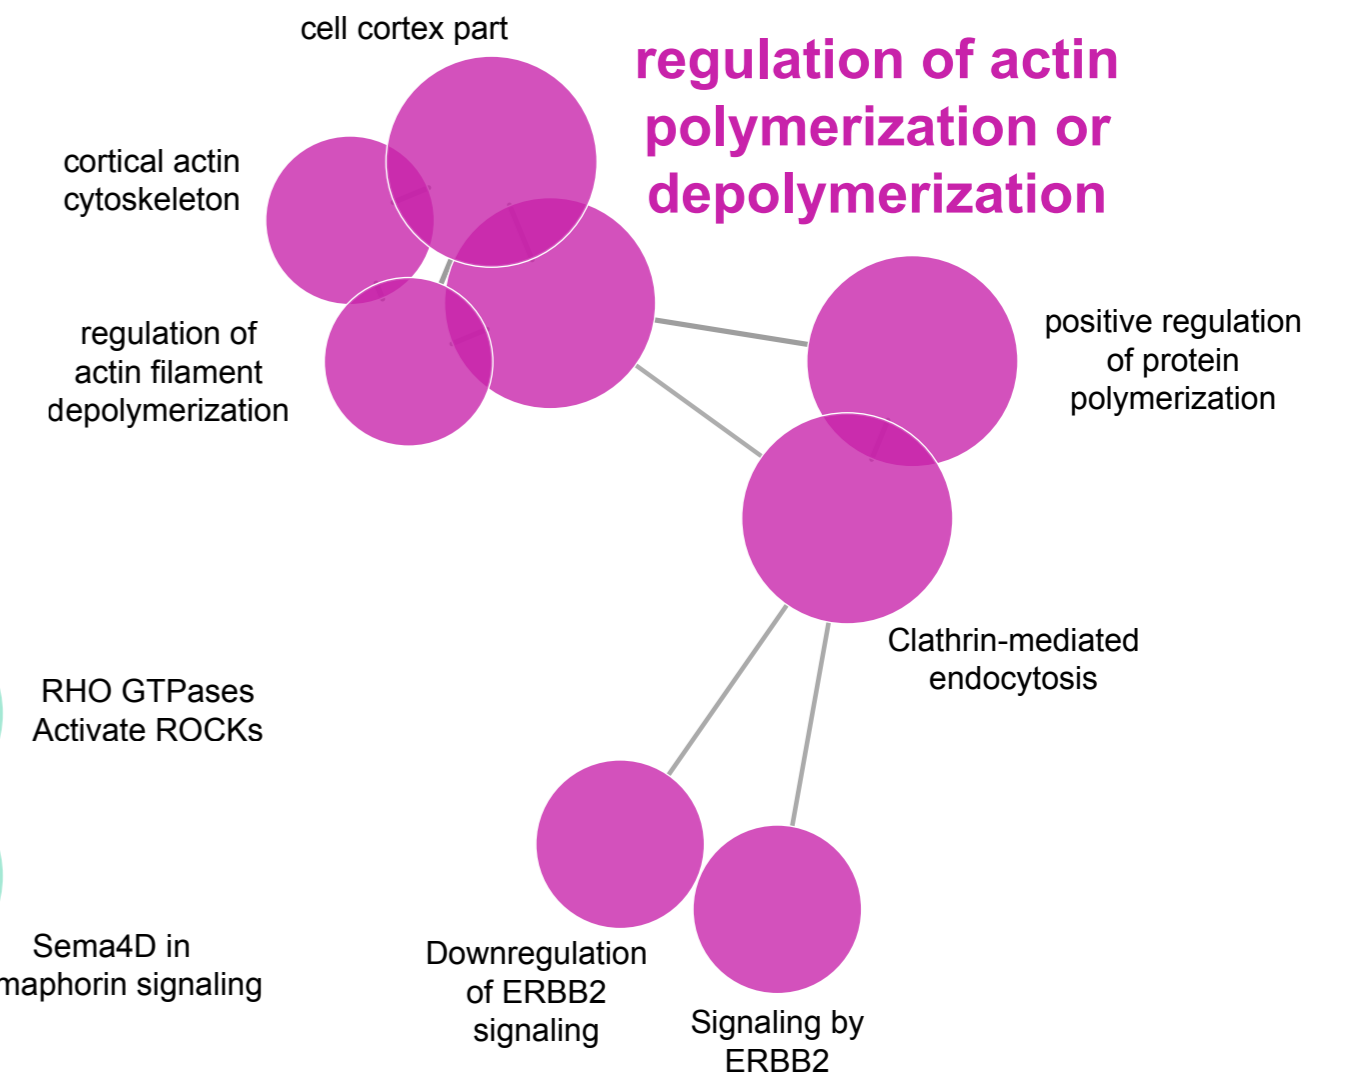

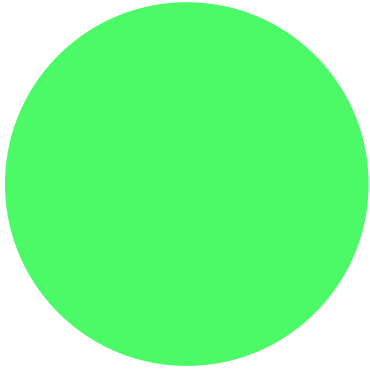

**alcohol catabolic  
process**

Age Differences  
in Disomic  
Samples

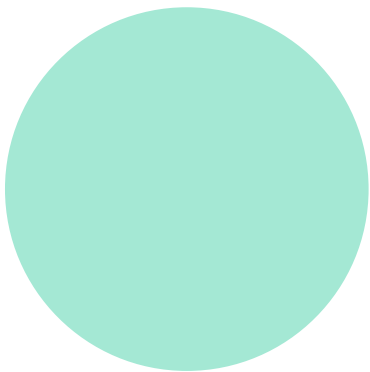

**Gluconeogenesis**

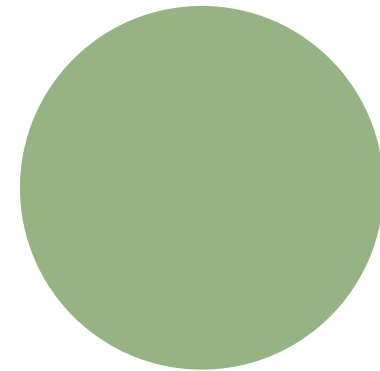

**hydro-lyase  
activity**
